# Supplementary material
Source: ML conference proceedings conference paper supplement (https://openreview.net/forum?id=QqG3wI3c8L)
Supplement: supplementary_material [file attachment]

# Resisting Over-Smoothing in Graph Neural Networks via Dual-Dimensional Decoupling

Wei Shen  
National Engineering Research  
Center for Multimedia Software,  
School of Computer Science, Wuhan  
University  
Wuhan, China  
weishen@whu.edu.cn

Mang Ye\*  
National Engineering Research  
Center for Multimedia Software,  
School of Computer Science, Wuhan  
University  
Wuhan, China  
yemang@whu.edu.cn

Wenke Huang  
National Engineering Research  
Center for Multimedia Software,  
School of Computer Science, Wuhan  
University  
Wuhan, China  
wenkehuang@whu.edu.cn

## Abstract

Graph Neural Networks (GNNs) are widely employed to derive meaningful node representations from graphs. Despite their success, deep GNNs frequently grapple with the oversmoothing issue, where node representations become highly indistinguishable due to repeated aggregations. In this work, we consider the oversmoothing issue from two aspects of the node embedding space: dimension and instance. Specifically, while existing methods primarily concentrate on instance-level node relations to mitigate oversmoothing, we propose to mitigate oversmoothing at dimension level. We reveal the heightened information redundancy between dimensions which diminishes information diversity and impairs node differentiation in GNNs. Motivated by this insight, we propose Dimension-Level Decoupling (DLD) to reduce dimensional information redundancy, enhancing dimensional-level node differentiation. Besides, at the instance level, the neglect of class differences leads to vague classification boundaries. Hence, we introduce Instance-Level Class-Difference Decoupling (ICDD) that repels inter-class nodes and attracts intra-class nodes, improving the instance-level node discrimination with clear classification boundaries. Additionally, we introduce a novel evaluation metric that considers the impact of class differences on node distances, facilitating precise oversmoothing measurement. Extensive experiments demonstrate the effectiveness of our method Dual-Dimensional Class-Difference Decoupling (DDCD) across diverse scenarios. Codes are available at <https://github.com/shentt67/DDCD>.

## CCS Concepts

• Mathematics of computing → Graph algorithms; • Computing methodologies → Regularization.

## Keywords

Graph Neural Networks, Oversmoothing, Regularization

\*Corresponding author

Permission to make digital or hard copies of all or part of this work for personal or classroom use is granted without fee provided that copies are not made or distributed for profit or commercial advantage and that copies bear this notice and the full citation on the first page. Copyrights for components of this work owned by others than the author(s) must be honored. Abstracting with credit is permitted. To copy otherwise, or republish, to post on servers or to redistribute to lists, requires prior specific permission and/or a fee. Request permissions from [permissions@acm.org](mailto:permissions@acm.org).  
MM '24, October 28–November 1, 2024, Melbourne, VIC, Australia  
© 2024 Copyright held by the owner/author(s). Publication rights licensed to ACM.  
ACM ISBN 979-8-4007-0686-8/24/10  
<https://doi.org/10.1145/3664647.3681204>

## ACM Reference Format:

Wei Shen, Mang Ye, and Wenke Huang. 2024. Resisting Over-Smoothing in Graph Neural Networks via Dual-Dimensional Decoupling. In *Proceedings of the 32nd ACM International Conference on Multimedia (MM '24)*, October 28–November 1, 2024, Melbourne, VIC, Australia. ACM, New York, NY, USA, 10 pages. <https://doi.org/10.1145/3664647.3681204>

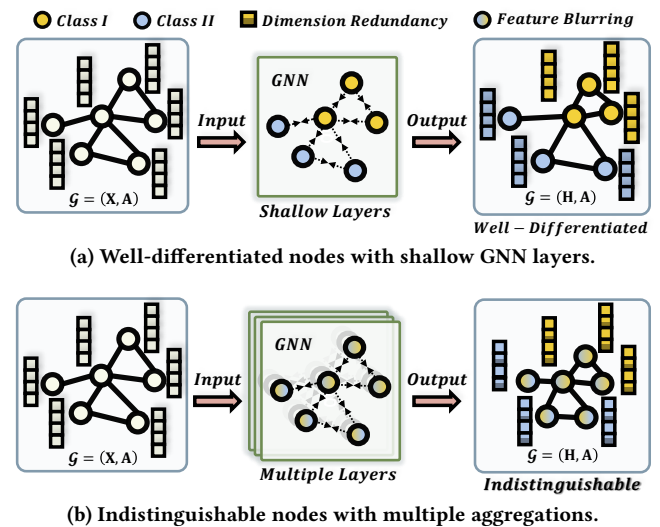

Figure 1: Illustration of *Oversmoothing*. (a) With shallow GNN layers, the node representations are well-differentiated. (b) The repeated information aggregations in deep GNNs lead to highly indistinguishable node representations. This phenomenon is widely recognized as *oversmoothing* issue.

## 1 Introduction

Graph data encodes information on both individual entities and the relationships between those entities, finding wide applications in practical scenarios such as social recommendation [14, 49, 81], node classification [26, 29, 32, 59], biology design [45, 51], and so on [43, 48, 58, 60, 68, 71]. To extract meaningful information from graph data, Graph Neural Networks (GNNs) [12, 32, 57, 61, 65, 82] are widely adopted and have shown promising results in generating effective node representations. Inspired by the success of deepening Convolutional Neural Network (CNN) layers [21, 33, 54, 55], recent works have attempted to improve GNN performance by increasing network depth to mine the multi-hop relation of graph

data. However, deeper GNN layers often suffer from performance degradation, which has been the subject of extensive discussions in recent years. Li *et al.* [38] first revealed that repeated information aggregations in deep GNNs lead to highly indistinguishable node representations and hampers performance. This phenomenon is widely recognized as *oversmoothing* issue [2, 30, 38, 46, 66].

Numerous efforts have been made to alleviate oversmoothing [27, 35, 50, 78, 79]. Several works tackle oversmoothing by modifying the model architecture. Li *et al.* [35, 36] proposed to apply residual/dense connections and achieve better performance with deeper GNNs. Chen *et al.* [44] proposed to utilize identity mapping to improve GNN capabilities. Zhou *et al.* [80] investigated oversmoothing by the Dirichlet energy and developed a generalized principle to train deep GNNs. However, the designs on model architecture are inflexible and introduce additional network parameters, limiting their applications. Besides, several works attempt to address oversmoothing from the graph structure and node embeddings, which can be appropriately applied to existing deep GNNs: Dropout-based methods [15, 42, 50] randomly drop node features or graph edges to avoid redundant aggregation but can inadvertently disrupt the node and structural information of the graph, losing original graph information; Normalization-based methods [27, 78, 79] address oversmoothing by normalizing node representations after each layer to preserve node distinctiveness, are versatile and can be readily applied to various GNN models. However, they mainly focus on instance-level cues and the dimension-level relations for enhancing node differentiation remain unexplored.

Beyond the aforementioned limitations, we consider the oversmoothing issue from two perspectives of the node embedding space: dimension and instance. In self-supervised learning, dimensional relations have been demonstrated to improve the representation capacity of the embedding space [1, 37, 39, 75]. Likewise, we assume that dimensional relations can also enhance the node representation in GNNs. We empirically uncovered that the pronounced information redundancy between dimensions hinders the capability of embeddings and impacts the node differentiation ability in GNNs (detailed in Section 3.3). Drawing inspiration from these insights, we propose to enhance node differentiation at the dimension level by reducing the information redundancy between dimensions of node embeddings in deep GNNs. To achieve this, we introduce the **Dimension-Level Decoupling (DLD)** that minimizes the covariance between dimensions in each GNN layer. It reduces the redundant information within node embedding dimensions, which effectively promotes diversity dimension information and enhances the differentiation ability of node embeddings.

Besides, existing instance-level methods normalize node representations without taking class differences into account, resulting in vague classification boundaries and performance degradation. For instance, Zhou *et al.* [79] introduced Differentiable Group Normalization (DGN) that assigns group probabilities and normalizes node representations based on group relations. However, nodes from different classes can be grouped together, leading to fuzzy class boundaries. To utilize class differences for explicit classification boundaries, we introduce the **Instance-Level Class-Difference Decoupling (ICDD)** to alleviate the oversmoothing issue, which can be applied to various GNN architectures. The basic idea is to repel the inter-class nodes and attract intra-class nodes after each

GNN layer, dynamically encouraging inter-class nodes to separate while maintaining similarity among intra-class node features. By decoupling node representations based on class differences, this strategy substantially enhances instance-level differentiation with explicit classification boundaries.

Additionally, existing metrics [6, 23] assess oversmoothing based on the distances between node pairs. However, the pair-wise distances are associated with class information: nodes in different classes should exhibit distinct pair-wise distances while having closer pair-wise distances in the same class. Without considering class differences, the pair-wise distances are affected by class information and fail to accurately assess oversmoothing. In this case, we introduce a new metric: **Relative Inter-Class Distance (RICD)**, which calculates the similarity difference between inter-class nodes and intra-class nodes. It focuses on the relative difference between inter-class nodes and intra-class nodes, accounting for the influence of class information on the accurate assessment of oversmoothing. In summary, our primary contributions can be outlined as follows:

- We propose a dual-dimensional decoupling method for alleviating oversmoothing, which can be readily applied to various deep GNNs. Firstly, at the dimension level, we propose to reduce dimension redundancy by minimizing dimension covariances, diversifying the dimension information and ultimately promoting well-differentiated nodes for mitigating oversmoothing.
- We propose incorporating class differences at the instance level to alleviate oversmoothing with explicit class boundaries. It dynamically encourages inter-class nodes to separate while maintaining similarity among intra-class node representations, significantly enhancing instance-level differentiation.
- We propose a novel metric to measure oversmoothing. It quantifies the similarity difference between inter-class nodes and intra-class nodes, considering the impact of class differences and accurately measuring the extent of oversmoothing.
- We empirically demonstrate our proposed method **DDCD (Dual-Dimensional Class-Difference Decoupling)**, can effectively mitigate oversmoothing by combining dimension and instance level cues, achieving state-of-the-art compared to existing methods.

## 2 Related Work

### 2.1 Graph Neural Network

Graph Neural Networks (GNNs) [13, 17, 52, 76] are proposed to generate meaningful node representations by propagation and transformation over multiple network layers. They can be broadly categorized into spectral-based [3, 12, 22, 32] and spatial-based [16, 19, 57] models. Spectral methods perform convolution operations in the graph domain using spectral filters [3] and their simplified variants. In spatial GNNs, convolution operations are carried out by propagating and aggregating local information along the edges of a graph. Different aggregation functions are employed in spatial GNNs to learn node representations, including mean/max pooling [19], self-attention [57], and summation [64].

### 2.2 Oversmoothing

Oversmoothing [2, 30, 38, 46, 66] is first defined by Li *et al.* [38], where the node representations become highly indistinguishable

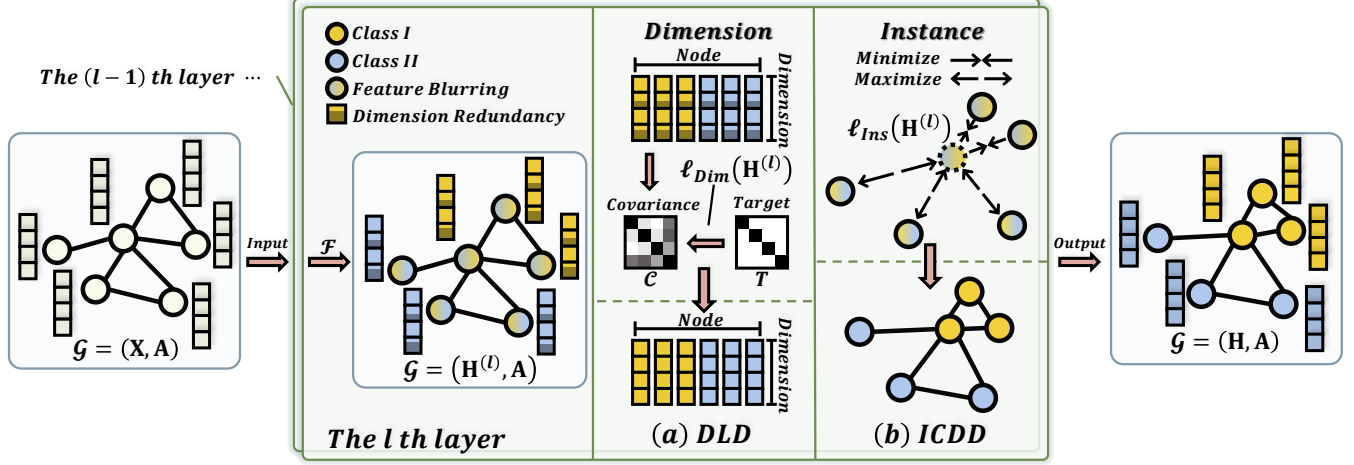

Figure 2: Framework of Dual-Dimensional Class-Difference Decoupling (DDCD). To enhance the dimension-level discriminability of nodes, (a): Dimension-Level Decoupling (DLD in Section 3.3) urges diverse dimensions by minimizing the information redundancy between dimensions, bringing well-differentiated representations; To alleviate oversmoothing with clear class boundaries, (b): Instance-Level Class-Difference Decoupling (ICDD in Section 3.4) utilizes class differences by repelling nodes from different classes and attracting nodes from the same classes, which promotes distinguishable node representation in instance-level. As such, the output graph  $\mathcal{G} = (\mathbf{H}, \mathbf{A})$  has distinguishable node representations  $\mathbf{H}$ . Best viewed in color.

in deep GNNs. Li *et al.* [38] attributed this issue to the multiple Laplacian smoothing steps and suggested that oversmoothing was a common phenomenon in GNNs as the Laplace operator is a ubiquitous component, hindering the superposition of GNN layers. Recent research [2, 30, 62, 67] has explored oversmoothing in-depth, emphasizing its significance in developing deep GNNs to enhance node representations [7, 11, 77, 80]. Several works alleviate oversmoothing from the perspective of model architecture designs [18, 34, 35, 44, 80]. However, the designs on model architecture are inflexible and introduce additional network parameters, hindering their applications. Some approaches involve dropping nodes or edges to avoid redundant aggregations [15, 42, 50], but inadvertently disrupting the node and structural information of the graph, leading to the loss of original graph information and performance degradation. Other methods address oversmoothing through layer-wise normalization [27, 78, 79], but the ignorance of class differences results in vague class boundaries and ultimately hinders performance. In this work, we present a flexible regularization method addressing oversmoothing with class differences.

### 2.3 Dimensional Information Redundancy

Dimensional Information Redundancy [41, 74] indicates a high degree of redundant information encoded across these dimensions. It restricts the diversity of dimension information, thereby impeding the representation capability of feature embeddings. This phenomenon is prevalent and has been extensively investigated in self-supervised learning [1, 25, 28, 37, 39, 75]. In this work, we first propose to alleviate oversmoothing at the dimension level. We reveal the heightened dimension information redundancy in GNNs, which inspires us to enhance dimension diversity for node differentiation by reducing the redundancy between dimensions.

### 2.4 Contrastive Learning

Contrastive Learning is widely applied [5, 70, 72], which maximizes the agreement between positive samples while minimizing the agreement between negative samples. It utilizes augmentations to construct contrastive samples and is often applied in self-supervised learning for label-scarce scenes [4, 9, 20, 63, 73] or for pre-training networks [8, 10, 31, 47, 56, 70] to boost downstream tasks. In this work, we utilize class differences to construct contrastive samples, suppressing oversmoothing with clear class boundaries.

## 3 Methodology

### 3.1 Preliminaries

We adopted the semi-supervised node classification (SSNC) setting proposed by Kipf and Welling [32] for our experiments. Specifically, in an undirected graph  $\mathcal{G} = (\mathcal{V}, \mathcal{E}, \mathbf{X})$ , each node  $v_i$  in  $\mathcal{V}$  is associated with a feature vector  $x_i \in \mathbb{R}^d$ , where  $\mathbf{X} = [x_1, \dots, x_n]$  represents the initial feature matrix.  $\mathcal{E} \subseteq \mathcal{V} \times \mathcal{V}$  denotes the edge set between nodes. The subset  $\mathcal{V}_s \subseteq \mathcal{V}$  of nodes are labeled with  $y_i \in \{0, \dots, c-1\}$  for  $v_i \in \mathcal{V}_s$ , where  $c$  is the number of classes. The adjacency matrix  $\mathbf{A} \in \{0, 1\}^{N \times N}$  encodes the relations between nodes, where  $A_{ij} = 1$  indicates edge connections between node  $v_i$  and  $v_j$ , otherwise  $A_{ij} = 0$ .

The task of SSNC is to predict the label of  $x_i \notin \mathcal{V}_s$  using the labeled nodes and graph structure. In GNNs, multiple network layers are utilized for propagation and transformation, with a linear layer for predicting the labels of nodes. Denoting the transformation and propagation as  $\mathcal{F}, \mathcal{P}$ , the forward process of multi-layer GNNs can be formulated as:

$$\mathbf{H}^{(l)} = \mathcal{F}(\mathcal{P}(\mathbf{H}^{(l-1)}, \mathbf{A})). \quad (1)$$

The number of GNN layers is  $n$ , and  $\mathbf{H}^{(l)}$  represents the output of  $l$ -th GNN layer where  $l \in \{1, \dots, n\}$ .

### 3.2 Relative Inter-Class Distance

When deepening GNNs by repeatedly aggregating neighbor node representations, the node representations tend to become highly indistinguishable, i.e., the oversmoothing issue. A robust evaluation mechanism is critical for investigating this issue. Existing works [6, 23] measure the degree of oversmoothing based on the distance between node pairs. However, the pair-wise distances are closely associated with graph information (e.g., the class labels). For the node classification task, nodes in different classes should exhibit distinct pair-wise distances, while nodes in the same class should have closer pair-wise distances. Without the consideration of class information, the pair-wise distances are affected by class labels and fail to accurately assess oversmoothing. In this case, we propose a new metric: Relative Inter-Class Distance, which considers the impacts of class differences to accurately measure oversmoothing.

**Relative Inter-Class Distance (RICD).** Denote the class set in the graph is  $\mathcal{M}$ . For class  $a \in \mathcal{M}$ , the node set is denoted by  $\mathcal{N}_a$ , and the node feature vector in  $\mathcal{N}_a$  is denoted as  $n_a$ . Denote  $|\cdot|$  is the set cardinality. The cosine similarity of node feature vectors  $n_a$  and  $n_b$  is  $\cos(n_a, n_b)$ . Firstly, we calculate the mean inter-class similarity as  $S_P$ :

$$S_P = \frac{2}{|\mathcal{M}|(|\mathcal{M}| - 1)} \sum_{a \neq b \in \mathcal{M}} \frac{1}{|\mathcal{N}_a||\mathcal{N}_b|} \sum_{n_a \in \mathcal{N}_a}^{n_b \in \mathcal{N}_b} \cos(n_a, n_b). \quad (2)$$

The mean intra-class similarity is formulated by:

$$S_Q = \frac{1}{|\mathcal{M}|} \sum_{c \in \mathcal{M}} \frac{1}{|\mathcal{N}_c|(|\mathcal{N}_c| - 1)} \sum_{n_w, n_z \in \mathcal{N}_c}^{w \neq z} \cos(n_w, n_z). \quad (3)$$

The formulation of RICD ( $D_C$ ) is as follows:

$$D_C = S_Q - S_P. \quad (4)$$

The high value of  $D_C$  means differentiated nodes and a low degree of oversmoothing. The proposed metric takes class differences into consideration, focusing on the relative discrepancy of inter-class nodes compared to intra-class ones, accurately measuring the degree of oversmoothing.

### 3.3 Dimension-Level Decoupling

In the following two sections, we elaborate on the proposed framework: Dual-Dimensional Class-Difference Decoupling (DDCD). It is divided into two components: (1) Dimension-Level Decoupling (DLD in Section 3.3) minimizes covariances between dimensions, reducing the dimensional information redundancy to enhance node differentiation and alleviate oversmoothing. (2) Instance-Level Class-Difference Decoupling (ICDD in Section 3.4), which adaptively attracts or repels intra/inter-class nodes, alleviating oversmoothing while establishing clear class boundaries.

**Motivation.** Existing methods primarily concentrate on instance-level cues related to node relations for mitigating oversmoothing. In the context of self-supervised learning, the dimensional relations have been proven significant in enhancing the representation capacity of the embedding space in prior works [25, 28, 75]. Likewise, we posit that dimensional relations can also enhance the node representation in GNNs to alleviate oversmoothing. Furthermore, in deep GNNs, we observe that the multiple GNN layers lead to a substantially increased information redundancy at the dimensional

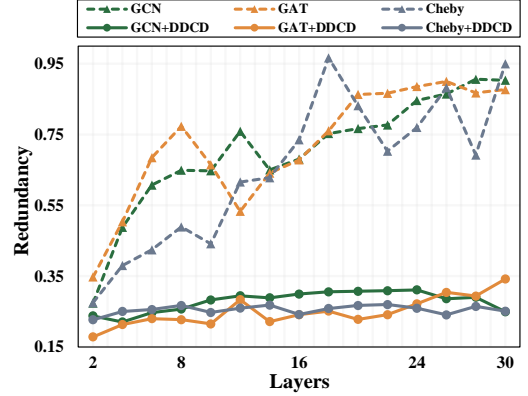

**Figure 3: The Dimensional Information Redundancy on Cora dataset. The results show the escalated dimensional information redundancy with multiple GNN layers, which hinders node differentiation and leads to oversmoothing.**

level, resulting in limited node differentiation and aggravated oversmoothing. Specifically, denote  $\mathbf{C}$  as the covariance matrix, which indicates the dimension redundancy of the embedding  $\mathbf{z}$ :

$$C_{ij} = \frac{(z_i - \bar{z}_i)(z_j - \bar{z}_j)}{\sqrt{(z_i - \bar{z}_i)^2} \sqrt{(z_j - \bar{z}_j)^2}}, \quad (5)$$

where  $i$  and  $j$  index the dimensions of  $\mathbf{z}$ , and  $\bar{z}_i$  represents the mean of  $z_i$ . As depicted in Figure 3, we compute the mean redundancy across all dimensions of final embeddings. It tends to increase with deeper GNN layers, suggesting a high degree of dimension redundancy. It implies that less information is encoded within the learned dimensions, consequently limiting the representation capacity of node embeddings and the differentiating ability of nodes.

The aforementioned insights motivate us to alleviate oversmoothing in deep GNNs by reducing the dimensional information redundancy, thereby boosting the diversity dimension information and enhancing the node differentiation ability. To extenuate dimensional information redundancy for well-differentiated nodes, we introduce a layer-wise decoupling module, DLD (Dimension-Level Decoupling). Concretely, in a  $K$ -layer GNN, assume  $\mathbf{H}^{(l)}$ ,  $l \in K$  is the  $l$ -th layer output,  $\mathbf{H}_i^{(l)}$  represents the  $i$ -th row of  $\mathbf{H}^{(l)}$ . We standardize the covariance matrix of the node representation matrix  $\mathbf{H}^{(l)}$  and the objective of DLD is defined as follows:

$$\ell_{Dim}(\mathbf{H}^{(l)}) = \sum_i \sum_{j \neq i} C_{ij}^{(l)2}, \quad (6)$$

where  $i, j$  indexes dimensions of node embedding.  $\mathbf{C}^{(l)}$  is the auto-covariance matrix of  $\mathbf{H}^{(l)}$ , which is formulated as:

$$C_{ij}^{(l)} = \frac{(\mathbf{H}_{:,i}^{(l)} - \bar{\mathbf{H}}_{:,i}^{(l)})(\mathbf{H}_{:,j}^{(l)} - \bar{\mathbf{H}}_{:,j}^{(l)})^T}{\sqrt{(\mathbf{H}_{:,i}^{(l)} - \bar{\mathbf{H}}_{:,i}^{(l)})^2} \sqrt{(\mathbf{H}_{:,j}^{(l)} - \bar{\mathbf{H}}_{:,j}^{(l)})^2}}, \quad (7)$$

$\bar{\mathbf{H}}_{:,i}^{(l)}$  represents the mean value of  $\mathbf{H}_{:,i}^{(l)}$ . To obtain well-differentiated final embeddings, we apply  $\ell_{Dim}$  in each layer, and the loss function  $\mathcal{L}_{Dim}$  can be defined as follows:

$$\mathcal{L}_{Dim} = \sum_{l=1}^K \ell_{Dim}(\mathbf{H}^{(l)}). \quad (8)$$

Minimizing  $\mathcal{L}_{Dim}$  encourages the dimensions independent in each layer, diversifying the dimension information, and ultimately improving the node differentiation for alleviating oversmoothing.

### 3.4 Instance-Level Class-Difference Decoupling

**Motivation.** At the instance level, existing methods alleviate oversmoothing without taking class differences into account, which results in vague classification boundaries. For example, Zhou *et al.* [79] introduced Differentiable Group Normalization (DGN), a normalization method that assigns group probabilities using a learnable linear layer and normalizes node representations based on group relations. However, nodes from different classes can be grouped together, leading to fuzzy class boundaries and degraded performance. To effectively leverage class differences and establish distinct classification boundaries for alleviating oversmoothing, an ideal approach should encourage inter-class nodes to diverge while preserving the similarity of intra-class nodes. Through instance-level decoupling that incorporates class differences, it significantly alleviates the oversmoothing with explicit classification boundaries, enhancing robust node representations.

Inspired by the above discussions, we propose a supervised contrastive learning method Instance-Level Class-Difference Decoupling (ICDD). It leverages class differences to enhance the discriminative capability of nodes at the instance level. The fundamental concept is to minimize the similarity between node representations from different classes while simultaneously preserving the similarity between node representations from the same class. Consequently, the output representations within each layer can be distinctly separated by class, effectively mitigating oversmoothing at the instance level. Denote  $\mathcal{N}$  as all node row indexes of the training set, and  $\mathcal{S}_i \subseteq \mathcal{N}$ ,  $i \in \mathcal{N}$  represents node indexes with the same class of  $i$ . Denote  $\mathcal{D}_i = \mathcal{N} - \{i\}$ , for loss function  $\ell_{Ins,i}$  of a single node  $i$  in  $\mathbf{H}^{(l)}$ , we have:

$$\ell_{Ins,i} = \frac{-1}{|\mathcal{S}_i|} \sum_{p \in \mathcal{S}_i}^{p \neq i} \log \frac{\exp(\mathbf{H}_i^{(l)} \cdot \mathbf{H}_p^{(l)} / \tau)}{\sum_{q \in \mathcal{D}_i} \exp(\mathbf{H}_i^{(l)} \cdot \mathbf{H}_q^{(l)} / \tau)}. \quad (9)$$

For nodes in the training set, the formulation is as follows:

$$\ell_{Ins}(\mathbf{H}^{(l)}) = \frac{1}{|\mathcal{N}|} \sum_{i \in \mathcal{N}} \ell_{Ins,i}. \quad (10)$$

Applying  $\ell_{Ins}$  in each GNN layer,  $\mathcal{L}_{Ins}$  is as follows:

$$\mathcal{L}_{Ins} = \sum_{l=1}^K \ell_{Ins}(\mathbf{H}^{(l)}). \quad (11)$$

Minimizing  $\mathcal{L}_{Ins}$  prompts the representations of each layer to be discriminative while maintaining the similarity of nodes from the same class, thereby mitigating the oversmoothing issue with explicit classification boundaries.

### 3.5 Overall Objective Function

The dimensional decoupling loss in Equation (8) diversifies dimension information and enhances the dimension-level node differentiation, while the instance-level decoupling loss in Equation (11) promotes well-differentiated nodes with explicit class boundaries. Besides, the typical classification loss is utilized to provide supervision for the classification task. Denote  $\mathcal{L}_0$  as the classification

| Dataset    | Nodes  | Edges   | Features | Classes |
|------------|--------|---------|----------|---------|
| Cora       | 2708   | 5429    | 1433     | 7       |
| Citeseer   | 3327   | 4732    | 3703     | 6       |
| Pubmed     | 19717  | 44338   | 500      | 3       |
| CoauthorCS | 18333  | 81894   | 6805     | 15      |
| ogbn-arxiv | 169343 | 1166243 | 128      | 40      |

**Table 1: Dataset Statistics.**

loss, and  $\ell_{ce}(v_i, y_i)$  as calculating the cross-entropy loss with the representation of node  $v_i$  and its class labels  $y_i$ . The classification loss can be formulated as follows:

$$\mathcal{L}_0 = \frac{1}{|\mathcal{V}_s|} \sum_{v_i \in \mathcal{V}_s} \ell_{ce}(v_i, y_i). \quad (12)$$

Combine with Equation (8), Equation (11), Equation (12), the overall objective function can be stated as (where  $\alpha > 0$  is a coefficient that balances the trade-off of dimension decoupling):

$$\begin{aligned} \mathcal{L} &= \alpha \mathcal{L}_{Dim} + \mathcal{L}_{Ins} + \mathcal{L}_0 \\ &= \alpha \sum_{l=1}^K \ell_{Dim}(\mathbf{H}^{(l)}) + \sum_{l=1}^K \ell_{Ins}(\mathbf{H}^{(l)}) + \frac{1}{|\mathcal{V}_s|} \sum_{v_i \in \mathcal{V}_s} \ell_{ce}(v_i, y_i). \end{aligned} \quad (13)$$

Compared to existing methods that primarily focus on instance-level relations, we reveal the intensified dimension redundancy in deep GNNs and introduce a novel approach to eliminate the redundancy for enhancing node differentiation. Additionally, we propose utilizing class differences in the instance-level decoupling, alleviating oversmoothing with explicit classification boundaries. The dual-dimensional decoupling strategies complement each other and further enhance the overall performance.

## 4 Experiment

**Datasets.** We conducted experiments on five well-known benchmarks: Cora, Citeseer, Pubmed [69], CoauthorCS [53] and ogbn-arxiv [24]. For the experiments on Cora/Citeseer/Pubmed, we followed the semi-supervised setting proposed by Kipf *et al.* [32], with 20 nodes per class for training. For CoauthorCS, we adopted the same setting in [79], using 40 nodes per class for training, 150 nodes per class for validation, and the remaining for testing. Besides, we also conduct experiments on large-scale datasets such as ogbn-arxiv [24], to demonstrate the effectiveness of DDCD to data scalability. The detailed statistics of datasets can be found in Table 1.

**Baselines.** We conducted experiments on three GNN backbones: GCN [32], GAT [57], and ChebyNet [12]. We compared three regularization baseline methods: BatchNorm (BN) [27], PairNorm (PN) [78], DGN [79], as well as three dropout methods: DropEdge (DE) [50], SkipNode (SN) [42], DropMessage (DM) [15]. To prove the effectiveness of DDCD in boosting deep GNNs, we experimented on two deep GNNs: GCNII [44] and EGNN [80].

**Hyperparameters.** We adopted the same experimental setting as DGN [79]. For Cora, Citeseer, and CoauthorCS, we used a dropout rate of 0.6, L2 regularization of  $5 \cdot 10^{-4}$ , and a learning rate of  $5 \cdot 10^{-3}$ . For Pubmed, we used a dropout rate of 0.6, L2 regularization of  $1 \cdot 10^{-3}$ , and a learning rate of  $1 \cdot 10^{-2}$ . We conducted each experiment five times and reported the average results. For BatchNorm, PairNorm, and DGN, we followed the results reported by Zhou *et*

| Dataset   | Layer | GCN          |       |       |              |       |       |              |                    | GAT          |              |       |       |       |       |              |                    | Cheby        |       |       |       |              |       |              |                    |
|-----------|-------|--------------|-------|-------|--------------|-------|-------|--------------|--------------------|--------------|--------------|-------|-------|-------|-------|--------------|--------------------|--------------|-------|-------|-------|--------------|-------|--------------|--------------------|
|           |       | NN           | DE    | SN    | DM           | BN    | PN    | DGN          | DDCD               | NN           | DE           | SN    | DM    | BN    | PN    | DGN          | DDCD               | NN           | DE    | SN    | DM    | BN           | PN    | DGN          | DDCD               |
| Cora      | 2L    | <b>82.20</b> | 79.94 | 79.41 | 81.15        | 73.90 | 71.00 | 82.00        | 80.36              | 80.90        | <b>81.44</b> | 78.25 | 79.93 | 77.80 | 71.00 | 81.10        | 79.72              | <b>81.40</b> | 79.56 | 78.56 | 79.63 | 67.92        | 65.52 | 79.98        | 79.70              |
|           | 15L   | 18.10        | 45.02 | 63.12 | 63.89        | 70.30 | 67.20 | <u>75.20</u> | <b>77.22</b> ↑2.02 | 16.80        | 44.70        | 52.37 | 53.46 | 33.10 | 49.60 | <u>71.80</u> | <b>73.70</b> ↑1.90 | 30.62        | 49.50 | 62.24 | 63.41 | 68.30        | 60.28 | 76.80        | <b>77.20</b> ↑0.40 |
|           | 30L   | 13.10        | 27.60 | 57.92 | 59.43        | 67.20 | 64.30 | <u>73.20</u> | <b>73.92</b> ↑0.43 | 13.00        | 24.42        | 38.59 | 40.57 | 25.00 | 30.20 | <u>51.30</u> | <b>56.33</b> ↑5.03 | 30.40        | 31.38 | 49.83 | 50.29 | 60.30        | 52.54 | 66.20        | <b>69.00</b> ↑2.80 |
| Citeseer  | 2L    | <b>70.60</b> | 68.45 | 67.83 | 68.96        | 51.30 | 60.50 | 69.50        | 69.91              | <u>70.20</u> | 67.30        | 67.39 | 68.25 | 61.50 | 62.00 | 69.30        | <b>71.20</b> ↑1.90 | <b>67.78</b> | 67.12 | 65.23 | 64.46 | 47.50        | 52.40 | 65.66        | 67.20              |
|           | 15L   | 15.20        | 25.80 | 39.42 | 42.37        | 46.90 | 46.70 | <u>53.10</u> | <b>59.90</b> ↑6.80 | 22.60        | 21.66        | 30.67 | 38.53 | 28.00 | 41.40 | <u>52.60</u> | <b>53.10</b> ↑0.50 | 44.78        | 42.28 | 40.62 | 41.79 | 40.60        | 40.88 | 48.50        | <b>56.60</b> ↑8.10 |
|           | 30L   | 9.40         | 12.62 | 32.69 | 38.54        | 47.90 | 47.10 | <u>52.60</u> | <b>56.12</b> ↑3.52 | 7.70         | 7.74         | 12.73 | 28.66 | 21.40 | 33.30 | 45.60        | <b>46.20</b> ↑0.60 | 35.90        | 28.46 | 28.33 | 30.67 | 36.88        | 38.12 | 45.68        | <b>50.00</b> ↑4.32 |
| Pubmed    | 2L    | <b>79.30</b> | 77.56 | 74.32 | 78.47        | 74.90 | 71.10 | 78.23        | 78.50              | <b>77.80</b> | 77.28        | 77.16 | 77.45 | 76.20 | 72.40 | <u>77.50</u> | 76.60              | <b>78.48</b> | 77.86 | 75.43 | 78.15 | 73.69        | 72.95 | <u>78.42</u> | 78.30              |
|           | 15L   | 22.50        | 34.24 | 57.63 | 62.57        | 73.70 | 70.60 | 76.10        | <b>77.70</b> ↑1.60 | 37.50        | 36.88        | 59.33 | 61.64 | 56.20 | 68.80 | <u>75.90</u> | <b>78.40</b> ↑2.50 | 46.36        | 44.66 | 59.62 | 61.03 | 70.22        | 69.16 | 76.08        | <b>77.50</b> ↑1.42 |
|           | 30L   | 18.00        | 22.56 | 21.98 | 37.43        | 70.40 | 70.40 | <u>76.90</u> | <b>77.10</b> ↑0.20 | 18.00        | 18.31        | 23.55 | 38.93 | 46.60 | 58.20 | <u>73.30</u> | <b>74.60</b> ↑1.30 | 39.58        | 40.52 | 57.23 | 59.06 | <u>71.14</u> | 57.74 | 70.24        | <b>74.20</b> ↑3.06 |
| Coauthor. | 2L    | 92.30        | 91.93 | 91.86 | <u>92.34</u> | 86.00 | 77.80 | 92.30        | <b>92.70</b> ↑0.36 | 91.50        | 90.63        | 90.42 | 91.67 | 89.40 | 85.90 | <u>91.80</u> | <b>91.92</b> ↑0.12 | <b>93.01</b> | 93.10 | 92.79 | 93.24 | 81.95        | 72.95 | 92.29        | 92.95              |
|           | 15L   | 72.20        | 37.61 | 45.63 | 52.13        | 78.50 | 69.50 | <u>83.70</u> | <b>85.34</b> ↑1.64 | 6.00         | 12.68        | 13.75 | 13.96 | 77.70 | 53.10 | <u>84.50</u> | <b>86.44</b> ↑1.94 | 70.04        | 35.02 | 48.77 | 53.83 | 76.81        | 57.74 | 83.36        | <b>89.03</b> ↑5.67 |
|           | 30L   | 3.30         | 26.53 | 34.32 | 40.71        | 84.30 | 64.50 | <u>84.40</u> | <b>84.48</b> ↑0.08 | 3.30         | 10.69        | 12.33 | 12.79 | 16.70 | 48.10 | <u>75.50</u> | <b>76.30</b> ↑0.80 | 35.18        | 20.33 | 31.44 | 34.73 | <u>81.77</u> | 65.80 | 79.04        | <b>82.58</b> ↑0.81 |

Table 2: The Node Classification Accuracy with 2, 15, and 30-layer GNNs. NN: vanilla GNN, DE: DropEdge [50], SN: SkipNode [42], DM: DropMessage [15], BN: BatchNorm [27], PN: PairNorm [78], DGN: Differentiable Group Normalization [79], DDCCD: Our method. Bold represents the highest accuracy. Underline represents the second-highest accuracy. See details in Section 4.1.

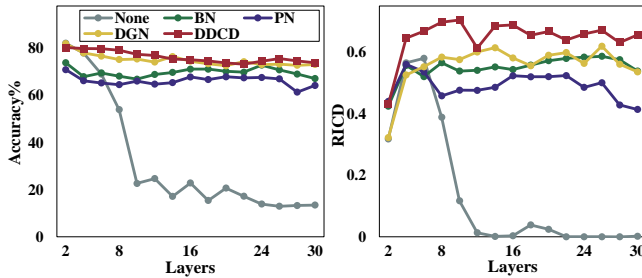

Figure 4: The Node Classification Accuracy and Relative Inter-Class Distance Comparison equipped with different regularization methods. Our method outperforms the baselines in different layer cases. Refer to Section 4.1 for more details.

al. [79] on GCN and GAT. To investigate the effects of hyperparameters, we adjusted the hyperparameters  $\alpha$  in  $\{0.002, 0.004, 0.006, 0.008, 0.01\}$  and  $\tau$  in  $\{0.01, 0.03, 0.05, 0.07, 0.09\}$  on the Cora dataset, reported the best performance with  $\alpha = 0.006$  and  $\tau = 0.05$ . Then we fixed  $\tau$ , adjusted  $\alpha$  in  $\{6 \cdot 10^{-6}, 6 \cdot 10^{-5}, 6 \cdot 10^{-4}, 6 \cdot 10^{-3}\}$  on Citeseer, Pubmed, and CoauthorCS, reported the best performance and recorded the values of  $\alpha$  respectively:  $6 \cdot 10^{-5}$  on Citeseer,  $6 \cdot 10^{-4}$  on Pubmed and CoauthorCS.

#### 4.1 Comparison with State-of-the-Art Methods

We provide comparison results on both regularization and dropout methods with different backbones and layer numbers. Firstly, we compare the baseline methods with 2, 15, and 30 layers on different GNNs. As shown in Table 2, compared with vanilla GNNs, DDCCD significantly alleviates performance degradation in deep GNNs; Compared with other baseline methods, DDCCD can achieve the highest classification performance in the same number of layers, which means better discrimination of node features, i.e., mitigating oversmoothing better. Subsequently, we further provided comparison results with different regularization methods in different layer cases, reporting the node classification accuracy of GCN on the Cora dataset, for a range of layer numbers in  $\{2, 4, \dots, 30\}$ . As shown in Figure 4, our proposed method achieved the best classification accuracy across various layer numbers, indicating that it performs better at mitigating oversmoothing in most cases. Additionally, to

| Component | Cora |      |              |              |              |              |              |              |          |
|-----------|------|------|--------------|--------------|--------------|--------------|--------------|--------------|----------|
|           | DLD  | ICDD | 2L           | 10L          | 15L          | 20L          | 30L          | AVG          | $\Delta$ |
| ✓         |      |      | <b>82.20</b> | 22.68        | 18.10        | 20.68        | 13.10        | 31.32        | -        |
| ✓         |      | ✓    | 81.76        | 62.48        | 48.36        | 27.78        | 27.52        | 49.58        | ↑18.26   |
| ✓         | ✓    |      | 81.76        | 67.24        | 68.84        | 65.08        | 40.50        | 64.68        | ↑33.36   |
| ✓         | ✓    |      | 80.36        | <b>77.26</b> | <b>77.22</b> | <b>74.32</b> | <b>73.92</b> | <b>76.62</b> | ↑45.30   |

Table 3: Ablation Study with DLD and ICDD. The precise accuracy values are reported. See Section 4.2 for details.

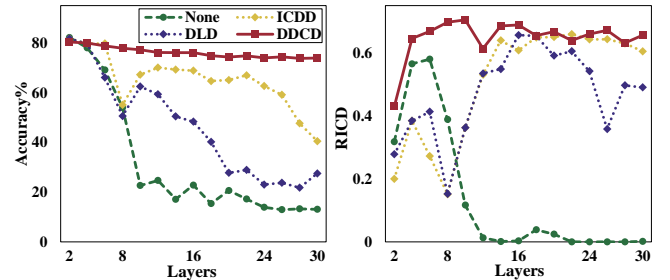

Figure 5: Ablation Study with DLD and ICDD. The node classification accuracy and Relative Inter-Class Distance are reported. Please refer to Section 4.2 for more details.

quantitatively assess the performance of alleviating oversmoothing, we reported the Relative Inter-Class Distance (RICD) on the Cora dataset with various layers on the GCN model. Our method consistently exhibited the largest RICD at all layer cases, indicating the lowest degree of oversmoothing. All results confirm that our method achieves superior mitigation compared to baseline methods on different GNN models and various network layers.

#### 4.2 Ablation Study

Firstly, we investigated the influence of two components, Dimension-Level Decoupling (in Section 3.3) and Instance-Level Class-Difference Decoupling (in Section 3.4), on the performance of the proposed method. We empirically demonstrate that both components have a positive impact on alleviating oversmoothing and can complementarily boost performance. Next, we investigate the effects of hyperparameters, demonstrating the stability with different parameters. Besides, we provide comparisons between Relative Inter-Class

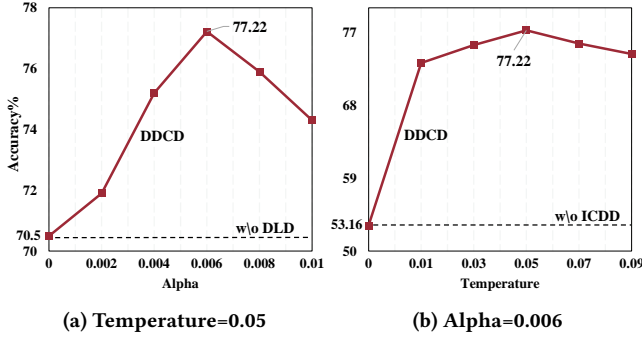

**Figure 6: Ablation Study on Hyperparameters.** (a) reports the ablation with different alpha  $\alpha$ , and (b) reports the ablation with different temperatures  $\tau$ . The results show the stability of our method to hyperparameters. See details in Section 4.2.

Distance (RICD) and existing metrics for oversmoothing, demonstrating the superiority of the proposed measurement.

**Effect of Each Component.** To thoroughly assess the effectiveness of DDCD, we conducted extensive ablation experiments on the Cora dataset with varying numbers of GCN layers. Based on the results presented in Table 3 and Figure 5, two main conclusions can be drawn. **Firstly**, both components have a positive impact on mitigating oversmoothing and enhancing performance. As depicted in Figure 5, both DLD and ICDD result in a larger RICD compared to the baseline, signifying the effective mitigation of oversmoothing; Additionally, as shown in Table 3, the utilization of DLD and ICDD results in an average performance improvement of 18.26% and 33.36% respectively, further indicating the successful alleviation of oversmoothing, subsequently enhancing classification performance across various layer scenarios. **Secondly**, the combination of these two components can complement each other and further enhance the performance. As illustrated in Table 3, the combination of DLD and ICDD outperforms the baseline by an average of 45.30%, underscoring the collaborative effect of both DLD and ICDD.

**Effect of Hyperparameters.** To investigate the impact of hyperparameters  $\tau$  and  $\alpha$  for the proposed method, we conducted two ablation experiments on the Cora dataset with 15-layer GCN. Specifically, we performed the following experiments with DDCD and reported the node classification accuracy: (1) we changed the value of  $\alpha$  while keeping  $\tau$  fixed at 0.05, and (2) changed the value of temperature  $\tau$  while keeping the value of  $\alpha$  fixed at 0.006.

In Experiment (1), as illustrated in Figure 6 (b), the performance of DDCD remains stable with changes in  $\alpha$ , and is further boosted with Dimension-Level Decoupling equipped; In Experiment (2), as shown in Figure 6 (a), we observed that the performance of DDCD remains stable with different values of  $\tau$ , and is further improved with ICDD equipped. Specifically, on the Cora dataset, our proposed method achieves the best performance with  $\tau = 0.05$ . We then apply the same value of  $\tau$  on the Citeseer, Pubmed, and CoauthorCS datasets, and obtain similarly strong results. Both Experiment (1) and (2) show the stability of our method to hyperparameters, and the complementary of two modules.

**Pair-wise Distance v.s. Relative Inter-Class Distance.** The pair-wise distance measures the degree of oversmoothing based on the distance between node pairs [6, 23, 40]. However, the pair-wise

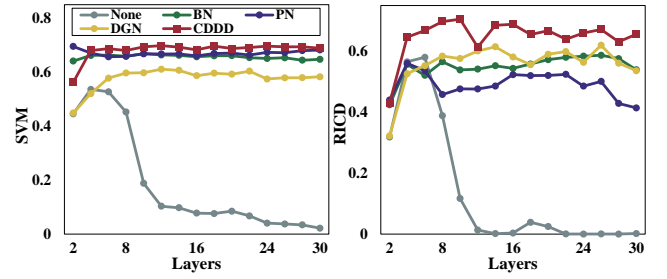

**Figure 7: Metric Comparisons.** The SMV [40] and Relative Inter-Class Distance (RICD) on the Cora dataset are reported. RICD can accurately measure oversmoothing compared to existing metrics. Please refer to Section 4.2.

distances are closely tied to graph information, such as class labels. In the context of the node classification task, nodes in distinct classes should display discernible pair-wise distances, while nodes within the same class should exhibit closer pair-wise distances. Failure to account for class information in the computation of pair-wise distances results in an impact from class labels, leading to an inaccurate assessment of oversmoothing. Specifically, we provide the comparisons of Relative Inter-Class Distance and the existing metric SMV from [40] on the GCN model. As depicted in Figure 7, SMV fails to accurately reflect the superiority of different methods. Notably, PairNorm and BatchNorm cannot be distinguished in SMV, and DGN demonstrates better oversmoothing alleviation but lower SMV than PN and BN. In contrast, the proposed RICD accurately reflects the superiority of different methods and the degree of oversmoothing alleviation.

### 4.3 Generalization Analysis

We conducted comprehensive experiments to prove the generalization of our method in various scenarios. **First**, we conducted experiments with SOTA deep GNN models, to emphasize the effectiveness of our approach in enhancing deep GNNs as a regularization technique. **Additionally**, we conducted experiments to demonstrate the robustness of our method in different settings and layer numbers. **Moreover**, we visualized the learned node representations, which depicts that DDCD is feasible to learn discriminative features for different classes.

**Boosting Deep GNN Models.** Our proposed DDCD can be treated as a regularization for addressing oversmoothing, which can be seamlessly incorporated into different deep GNN models. To demonstrate the effectiveness of our method in enhancing deep GNNs, we apply DDCD to two deep models [44, 80] for graph data, with various network layers on the Cora dataset. As demonstrated in Table 4, our method significantly enhances the performance of deep GNNs by mitigating the oversmoothing issue.

**Generalization to Large-Scale Graph.** To demonstrate the generalization of the proposed DDCD to the graph scalability, we conduct experiments on the large-scale graph: ogbn-arxiv. To reduce the computational complexity, we randomly sample  $\sqrt{N}$  nodes to apply DDCD in each GNN layer. As shown in Table 5, we perform experiments on GCN and GAT with different layers, and the performance is consistently improved across all cases, demonstrating the robustness of DDCD to dataset scalability.

| Method | GCNII [44]   |              |              | EGNN [80]    |              |              |
|--------|--------------|--------------|--------------|--------------|--------------|--------------|
|        | 2L           | 32L          | 64L          | 2L           | 32L          | 64L          |
| Base   | 82.40        | 84.80        | 85.40        | 83.20        | 85.50        | 85.70        |
| + DDCD | <b>82.60</b> | <b>85.60</b> | <b>86.30</b> | <b>83.80</b> | <b>85.67</b> | <b>86.10</b> |

**Table 4: Experiments with Deep GNNs.** Classification accuracy on the Cora Dataset is reported, indicating the effectiveness of DDCD for alleviating oversmoothing in deep GNNs.

| Method | GCN          |              |              | GAT          |              |              |
|--------|--------------|--------------|--------------|--------------|--------------|--------------|
|        | 2L           | 15L          | 30L          | 2L           | 15L          | 30L          |
| Base   | 70.40        | 70.60        | 68.50        | 68.40        | 72.70        | 72.70        |
| + DDCD | <b>70.60</b> | <b>70.84</b> | <b>68.92</b> | <b>68.80</b> | <b>72.95</b> | <b>72.95</b> |

**Table 5: Experiments on Large-Scale Graph.** Classification accuracy on the ogbn-arxiv dataset is reported. The results show DDCD can generalize to large-scale graphs.

| Method | GCN          |              |              |              |              |              |              |
|--------|--------------|--------------|--------------|--------------|--------------|--------------|--------------|
|        | 2L           | 8L           | 10L          | 15L          | 20L          | 25L          | 30L          |
| Base   | 71.79        | 35.78        | 12.44        | 8.49         | 8.35         | 8.36         | 8.35         |
| + DDCD | <b>71.81</b> | <b>74.88</b> | <b>77.15</b> | <b>77.19</b> | <b>76.96</b> | <b>74.47</b> | <b>72.07</b> |

**Table 6: Experiments on Imbalanced Classes.** Classification accuracy on the Cora dataset is reported. The results prove the generalization of DDCD with imbalanced classes.

**Generalization to Imbalanced Classes.** We leveraged class differences to address oversmoothing, and the performance of our method may potentially be influenced by the imbalanced numbers of nodes among different classes. To investigate the generalization of DDCD to the imbalanced classes, we re-sampled the Cora dataset, where one of the classes has three times as many nodes as the other classes. As depicted in Table 6, our method consistently and effectively mitigates oversmoothing in all layer cases, indicating the robustness of DDCD to imbalanced classes.

**Different Numbers of Layers with GAT/Cheby.** To demonstrate the generalization of DDCD with various layer numbers, we provided experimental results for the GAT and Cheby models with different numbers of layers. As depicted in Figure 8, we experimented from 2 to 30 layers, and the incorporation of DDCD leads to a larger RICD and consistently improves classification accuracy in all layer scenarios, signifying the effective alleviation of oversmoothing and consequently boosting performance.

**Node Representation Visualization.** We visualized the node representations of vanilla GCN, DGN [79], and DDCD with a 30-layer model on the Cora dataset. As depicted in Figure 9 (a), when with deep network architecture (30 layers), the node representations become mixed and cannot be clearly distinguished, indicating severe oversmoothing and leading to a decline in classification performance. Upon the integration of DGN [79], as illustrated in Figure 9 (b), nodes can be roughly categorized by class, but the inappropriate grouping strategy blurs the nodes at the classification

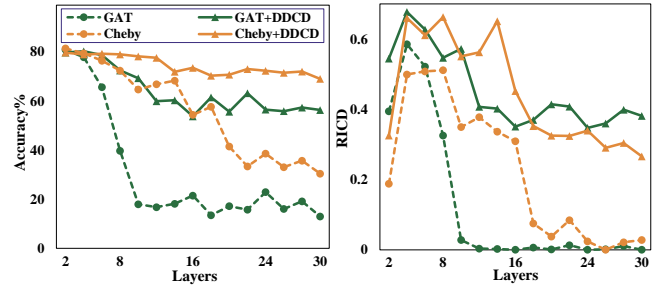

**Figure 8: More Layer Cases with GAT/Cheby.** The classification accuracy and Relative Inter-Class Distance on the Cora dataset are reported. The results demonstrate the generalization of DDCD with different layers.

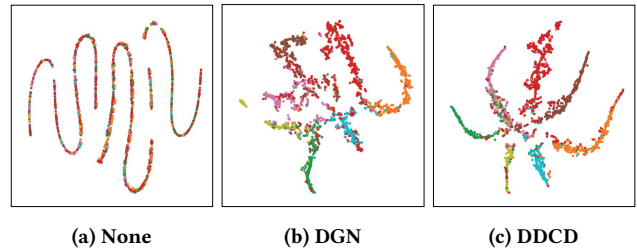

**Figure 9: Visualization of Node Representations:** (a), (b), and (c) visualized node embeddings with 30-layer vanilla GCN and the one equipped with DGN [79]/DDCD. The result demonstrates DDCD promotes discriminative features effectively. Colors indicate nodes from different classes.

boundaries. However, as shown in Figure 9 (c), the node representations exhibit well discrimination and explicit classification boundaries equipped with DDCD.

## 5 Conclusion

In deep GNNs, node representations become highly indistinguishable due to repeated aggregations, i.e., the oversmoothing issue. In this paper, we construct a simple and effective dual-dimensional regularization method to address the oversmoothing issue. Specifically, we consider the oversmoothing issue from two aspects of the node embedding space: dimension and instance. At the dimension level, we first reveal the dimensional causes for oversmoothing and propose to alleviate oversmoothing by minimizing covariances between dimensions to enhance node differentiation. Besides, at the instance level, we propose to utilize class differences, alleviating oversmoothing with explicit class boundaries. This research provides valuable insights for tackling oversmoothing in deep GNNs and will facilitate potential real-world applications. In future work, it is significant to generalize our instance-level method for tasks lacking node labels, e.g., link prediction tasks, where linked/unlinked nodes can be regarded as intra/inter-class samples and instance-level decoupling helps obtain discriminative node representations.



## Acknowledgments

This work is supported by National Natural Science Foundation of China under Grant (62176188, 62225113, 623B2080). The numerical calculations in this paper have been supported by the super-computing system in the Supercomputing Center of Wuhan University.

## References

- [1] Adrien Bardes, Jean Ponce, and Yann LeCun. 2022. Vicreg: Variance-invariance-covariance regularization for self-supervised learning. In *ICLR*.
- [2] Cristian Bodnar, Francesco Di Giovanni, Benjamin Chamberlain, Pietro Liò, and Michael Bronstein. 2022. Neural sheaf diffusion: A topological perspective on heterophily and oversmoothing in gnns. In *NeurIPS*. 18527–18541.
- [3] Joan Bruna, Wojciech Zaremba, Arthur Szlam, and Yann LeCun. 2013. Spectral networks and locally connected networks on graphs. *arXiv preprint arXiv:1312.6203* (2013).
- [4] Mathilde Caron, Ishan Misra, Julien Mairal, Priya Goyal, Piotr Bojanowski, and Armand Joulin. 2020. Unsupervised learning of visual features by contrasting cluster assignments. In *NeurIPS*. 9912–9924.
- [5] Cuiqun Chen, Mang Ye, Meibin Qi, and Bo Du. 2023. SketchTrans: Disentangled prototype learning with transformer for sketch-photo recognition. *TPAMI* (2023).
- [6] Deli Chen, Yankai Lin, Wei Li, Peng Li, Jie Zhou, and Xu Sun. 2020. Measuring and relieving the over-smoothing problem for graph neural networks from the topological view. In *AAAI*. 3438–3445.
- [7] Qi Chen, Yifei Wang, Yisen Wang, Jiansheng Yang, and Zhouchen Lin. 2022. Optimization-induced graph implicit nonlinear diffusion. In *ICML*. 3648–3661.
- [8] Ting Chen, Simon Kornblith, Mohammad Norouzi, and Geoffrey Hinton. 2020. A simple framework for contrastive learning of visual representations. In *ICML*. 1597–1607.
- [9] Ting Chen, Simon Kornblith, Kevin Swersky, Mohammad Norouzi, and Geoffrey E Hinton. 2020. Big self-supervised models are strong semi-supervised learners. In *NeurIPS*. 22243–22255.
- [10] Xinlei Chen, Haoqi Fan, Ross Girshick, and Kaiming He. 2020. Improved baselines with momentum contrastive learning. *arXiv preprint arXiv:2003.04297* (2020).
- [11] Weilin Cong, Morteza Ramezani, and Mehrdad Mahdavi. 2021. On provable benefits of depth in training graph convolutional networks. In *NeurIPS*. 9936–9949.
- [12] Michaël Defferrard, Xavier Bresson, and Pierre Vandergheynst. 2016. Convolutional neural networks on graphs with fast localized spectral filtering. In *NeurIPS*.
- [13] Wei Duan, Junyu Xuan, Maoying Qiao, and Jie Lu. 2022. Learning from the dark: boosting graph convolutional neural networks with diverse negative samples. In *AAAI*. 6550–6558.
- [14] Wenqi Fan, Yao Ma, Qing Li, Yuan He, Eric Zhao, Jiliang Tang, and Dawei Yin. 2019. Graph neural networks for social recommendation. In *WWW*. 417–426.
- [15] Taoran Fang, Zhiqing Xiao, Chungping Wang, Jiarong Xu, Xuan Yang, and Yang Yang. 2023. Dropmessage: Unifying random dropping for graph neural networks. In *AAAI*. 4267–4275.
- [16] Justin Gilmer, Samuel S Schoenholz, Patrick F Riley, Oriol Vinyals, and George E Dahl. 2017. Neural message passing for quantum chemistry. In *ICML*. 1263–1272.
- [17] Marco Gori, Gabriele Monfardini, and Franco Scarselli. 2005. A new model for learning in graph domains. In *IJCNN*. 729–734.
- [18] Fangda Gu, Heng Chang, Wenwu Zhu, Somayeh Sojoudi, and Laurent El Ghaoui. 2020. Implicit graph neural networks. In *NeurIPS*. 11984–11995.
- [19] Will Hamilton, Zhitaoying, and Jure Leskovec. 2017. Inductive representation learning on large graphs. In *NeurIPS*.
- [20] Kaiming He, Haoqi Fan, Yuxin Wu, Saining Xie, and Ross Girshick. 2020. Momentum contrast for unsupervised visual representation learning. In *CVPR*. 9729–9738.
- [21] Kaiming He, Xiangyu Zhang, Shaoqing Ren, and Jian Sun. 2016. Deep residual learning for image recognition. In *CVPR*. 770–778.
- [22] Mikael Henaff, Joan Bruna, and Yann LeCun. 2015. Deep convolutional networks on graph-structured data. *arXiv preprint arXiv:1506.05163* (2015).
- [23] Yifan Hou, Jian Zhang, James Cheng, Kaili Ma, Richard T. B. Ma, Hongzhi Chen, and Ming-Chang Yang. 2020. Measuring and Improving the Use of Graph Information in Graph Neural Networks. In *ICLR*.
- [24] Weihua Hu, Matthias Fey, Marinka Zitnik, Yuxiao Dong, Hongyu Ren, Bowen Liu, Michele Catasta, and Jure Leskovec. 2020. Open graph benchmark: Datasets for machine learning on graphs. In *NeurIPS*. 22118–22133.
- [25] Tianyu Hua, Wenxiao Wang, Zihui Xue, Sucheng Ren, Yue Wang, and Hang Zhao. 2021. On feature decorrelation in self-supervised learning. In *ICCV*. 9598–9608.
- [26] Wenke Huang, Guancheng Wan, Mang Ye, and Bo Du. 2023. Federated Graph Semantic and Structural Learning. In *IJCAI*.
- [27] Sergey Ioffe and Christian Szegedy. 2015. Batch normalization: Accelerating deep network training by reducing internal covariate shift. In *ICML*. 448–456.
- [28] Li Jing, Pascal Vincent, Yann LeCun, and Yuandong Tian. 2022. Understanding dimensional collapse in contrastive self-supervised learning. In *ICLR*.
- [29] Yongcheng Jing, Chongbin Yuan, Li Ju, Yiding Yang, Xinchao Wang, and Dacheng Tao. 2023. Deep Graph Reprogramming. In *CVPR*. 24345–24354.
- [30] Nicolas Keriven. 2022. Not too little, not too much: a theoretical analysis of graph (over) smoothing. In *NeurIPS*. 2268–2281.
- [31] Prannay Khosla, Piotr Teterwak, Chen Wang, Aaron Sarna, Yonglong Tian, Phillip Isola, Aaron Maschiot, Ce Liu, and Dilip Krishnan. 2020. Supervised contrastive learning. In *NeurIPS*. 18661–18673.
- [32] Thomas N Kipf and Max Welling. 2017. Semi-supervised classification with graph convolutional networks. In *ICLR*.
- [33] Alex Krizhevsky, Ilya Sutskever, and Geoffrey E Hinton. 2017. Imagenet classification with deep convolutional neural networks. *Commun. ACM* (2017), 84–90.
- [34] Guohao Li, Matthias Müller, Bernard Ghanem, and Vladlen Koltun. 2021. Training graph neural networks with 1000 layers. In *ICML*. 6437–6449.
- [35] Guohao Li, Matthias Muller, Ali Thabet, and Bernard Ghanem. 2019. Deepgcn: Can gcn go as deep as cnns?. In *ICCV*. 9267–9276.
- [36] Guohao Li, Chenxin Xiong, Ali Thabet, and Bernard Ghanem. 2020. Deeppergn: All you need to train deeper gcn. *arXiv preprint arXiv:2006.07739* (2020).
- [37] Jiangmeng Li, Wenwen Qiang, Yanan Zhang, Wenyi Mo, Changwen Zheng, Bing Su, and Hui Xiong. 2022. MetaMask: Revisiting Dimensional Confounder for Self-Supervised Learning. In *NeurIPS*. 38501–38515.
- [38] Qimai Li, Zhichao Han, and Xiao-Ming Wu. 2018. Deeper insights into graph convolutional networks for semi-supervised learning. In *AAAI*.
- [39] Kang-Jun Liu, Masanori Suganuma, and Takayuki Okatani. 2022. Bridging the gap from asymmetry tricks to decorrelation principles in non-contrastive self-supervised learning. In *NeurIPS*. 19824–19835.
- [40] Meng Liu, Hongyang Gao, and Shuiwang Ji. 2020. Towards deeper graph neural networks. In *SIGKDD*. 338–348.
- [41] Gregory Roger Lockhead. 1966. Effects of dimensional redundancy on visual discrimination. *Journal of Experimental Psychology* (1966), 95.
- [42] Weigang Lu, Yibing Zhan, Binbin Lin, Ziyu Guan, Liu Liu, Baosheng Yu, Wei Zhao, Yaming Yang, and Dacheng Tao. 2022. SkipNode: On alleviating performance degradation for deep graph convolutional networks. *TKDE* (2022).
- [43] Yixuan Ma, Xiaolin Zhang, Peng Zhang, and Kun Zhan. 2023. Entropy Neural Estimation for Graph Contrastive Learning. In *ACM MM*. 435–443.
- [44] Zhewei Wei Ming Chen, Bolin Ding Zengfeng Huang, and Yaliang Li. 2020. Simple and Deep Graph Convolutional Networks. In *ICML*.
- [45] Lucas Morin, Martin Danelljan, Maria Isabel Agea, Ahmed Nassar, Valery Weber, Ingmar Meijer, Peter Staar, and Fisher Yu. 2023. MolGrapher: Graph-based Visual Recognition of Chemical Structures. In *ICCV*. 19552–19561.
- [46] Khang Nguyen, Nong Minh Hieu, Vinh Duc Nguyen, Nhat Ho, Stanley Osher, and Tan Minh Nguyen. 2023. Revisiting over-smoothing and over-squashing using ollivier-ricci curvature. In *ICML*. 25956–25979.
- [47] Aaron van den Oord, Yazhe Li, and Oriol Vinyals. 2018. Representation learning with contrastive predictive coding. *arXiv preprint arXiv:1807.03748* (2018).
- [48] Jinhui Pang, Zixuan Wang, Jiliang Tang, Mingyan Xiao, and Nan Yin. 2023. Sa-gda: Spectral augmentation for graph domain adaptation. In *ACM MM*. 309–318.
- [49] Bryan Perozzi, Rami Al-Rfou, and Steven Skiena. 2014. Deepwalk: Online learning of social representations. In *SIGKDD*. 701–710.
- [50] Yu Rong, Wenbing Huang, Tingyang Xu, and Junzhou Huang. 2020. Dropedge: Towards deep graph convolutional networks on node classification. In *ICLR*.
- [51] Soumya Sanyal, Ivan Anishchenko, Anirudh Dagar, David Baker, and Partha Talukdar. 2020. ProteinGCN: Protein model quality assessment using graph convolutional networks. *BioRxiv* (2020).
- [52] Franco Scarselli, Marco Gori, Ah Chung Tsoi, Markus Hagenbuchner, and Gabriele Monfardini. 2008. The graph neural network model. *IEEE transactions on neural networks* (2008), 61–80.
- [53] Oleksandr Shchur, Maximilian Mumme, Aleksandar Bojchevski, and Stephan Günnemann. 2018. Pitfalls of graph neural network evaluation. In *NeurIPS*.
- [54] Karen Simonyan and Andrew Zisserman. 2015. Very deep convolutional networks for large-scale image recognition. In *ICLR*.
- [55] Christian Szegedy, Wei Liu, Yangqing Jia, Pierre Sermanet, Scott Reed, Dragomir Anguelov, Dumitru Erhan, Vincent Vanhoucke, and Andrew Rabinovich. 2015. Going deeper with convolutions. In *CVPR*. 1–9.
- [56] Yonglong Tian, Dilip Krishnan, and Phillip Isola. 2020. Contrastive multiview coding. In *ECCV*. 776–794.
- [57] Petar Velickovic, Guillem Cucurull, Arantxa Casanova, Adriana Romero, Pietro Lio, and Yoshua Bengio. 2017. Graph attention networks. *stat* (2017), 20.
- [58] Guancheng Wan, Wenke Huang, and Mang Ye. 2024. Federated Graph Learning under Domain Shift with Generalizable Prototypes. In *AAAI*. 15429–15437.
- [59] Guancheng Wan, Yijun Tian, Wenke Huang, Nitesh V Chawla, and Mang Ye. 2024. S3GCL: Spectral, Swift, Spatial Graph Contrastive Learning. In *ICML*.
- [60] Yi Wen, Suyuan Liu, Xinhang Wan, Siwei Wang, Ke Liang, Xinwang Liu, Xihong Yang, and Pei Zhang. 2023. Efficient Multi-View Graph Clustering with Local and Global Structure Preservation. In *ACM MM*. 3021–3030.

- [61] Felix Wu, Amauri Souza, Tianyi Zhang, Christopher Fifty, Tao Yu, and Kilian Weinberger. 2019. Simplifying graph convolutional networks. In *ICML*. 6861–6871.
- [62] Xinyi Wu, Zhengdao Chen, William Wang, and Ali Jadbabaie. 2023. A Non-Asymptotic Analysis of Oversmoothing in Graph Neural Networks. In *ICLR*.
- [63] Zhirong Wu, Yuanjun Xiong, Stella X Yu, and Dahua Lin. 2018. Unsupervised feature learning via non-parametric instance discrimination. In *CVPR*. 3733–3742.
- [64] Keyulu Xu, Weihua Hu, Jure Leskovec, and Stefanie Jegelka. 2018. How powerful are graph neural networks?. In *ICLR*.
- [65] Keyulu Xu, Chengtao Li, Yonglong Tian, Tomohiro Sonobe, Ken-ichi Kawarabayashi, and Stefanie Jegelka. 2018. Representation learning on graphs with jumping knowledge networks. In *ICML*. 5453–5462.
- [66] Yujun Yan, Milad Hashemi, Kevin Swersky, Yaoqing Yang, and Danai Koutra. 2022. Two sides of the same coin: Heterophily and oversmoothing in graph convolutional neural networks. In *ICDM*. 1287–1292.
- [67] Liang Yang, Jiayi Wang, Tingting Zhang, Dongxiao He, Chuan Wang, Yuanfang Guo, Xiaochun Cao, Bingxin Niu, and Zhen Wang. 2023. Long Short-Term Graph Memory Against Class-imbalanced Over-smoothing. In *ACM MM*. 2955–2963.
- [68] Xihong Yang, Cheng Tan, Yue Liu, Ke Liang, Siwei Wang, Sihang Zhou, Jun Xia, Stan Z Li, Xinwang Liu, and En Zhu. 2023. Convert: Contrastive graph clustering with reliable augmentation. In *ACM MM*. 319–327.
- [69] Zhilin Yang, William Cohen, and Ruslan Salakhudinov. 2016. Revisiting semi-supervised learning with graph embeddings. In *ICML*. 40–48.
- [70] Mang Ye, Jianbing Shen, Xu Zhang, Pong C Yuen, and Shih-Fu Chang. 2020. Augmentation invariant and instance spreading feature for softmax embedding. *TPAMI* 44, 2 (2020), 924–939.
- [71] Mang Ye, Wei Shen, Eduard Snezhko, Vassili Kovalev, Pong C Yuen, and Bo Du. 2024. Vertical Federated Snezhing for Effectiveness, Security, Applicability: A Survey. *arXiv preprint arXiv:2405.17495* (2024).
- [72] Mang Ye, Zesen Wu, Cuiqun Chen, and Bo Du. 2023. Channel augmentation for visible-infrared re-identification. *TPAMI* (2023).
- [73] Mang Ye, Xu Zhang, Pong C Yuen, and Shih-Fu Chang. 2019. Unsupervised embedding learning via invariant and spreading instance feature. In *CVPR*. 6210–6219.
- [74] Lei Yu and Huan Liu. 2003. Efficiently handling feature redundancy in high-dimensional data. In *SIGKDD*. 685–690.
- [75] Jure Zbontar, Li Jing, Ishan Misra, Yann LeCun, and Stéphane Deny. 2021. Barlow twins: Self-supervised learning via redundancy reduction. In *ICML*. 12310–12320.
- [76] Hongyuan Zhang, Yanan Zhu, and Xuelong Li. 2024. Decouple Graph Neural Networks: Train Multiple Simple GNNs Simultaneously Instead of One. *TPAMI* (2024).
- [77] Wentao Zhang, Zeang Sheng, Mingyu Yang, Yang Li, Yu Shen, Zhi Yang, and Bin Cui. 2022. NAFS: A Simple yet Tough-to-beat Baseline for Graph Representation Learning. In *ICML*. 26467–26483.
- [78] Lingxiao Zhao and Leman Akoglu. 2020. Pairnorm: Tackling oversmoothing in gnns. In *ICLR*.
- [79] Kaixiong Zhou, Xiao Huang, Yuening Li, Daochen Zha, Rui Chen, and Xia Hu. 2020. Towards deeper graph neural networks with differentiable group normalization. In *NeurIPS*. 4917–4928.
- [80] Kaixiong Zhou, Xiao Huang, Daochen Zha, Rui Chen, Li Li, Soo-Hyun Choi, and Xia Hu. 2021. Dirichlet energy constrained learning for deep graph neural networks. In *NeurIPS*. 21834–21846.
- [81] Xin Zhou and Zhiqi Shen. 2023. A tale of two graphs: Freezing and denoising graph structures for multimodal recommendation. In *ACM MM*. 935–943.
- [82] Jiaming Zhuo, Can Cui, Kun Fu, Bingxin Niu, Dongxiao He, Yuanfang Guo, Zhen Wang, Chuan Wang, Xiaochun Cao, and Liang Yang. 2023. Propagation is All You Need: A New Framework for Representation Learning and Classifier Training on Graphs. In *ACM MM*. 481–489.
